# Supplementary material for: Carbon electrode obtained via pyrolysis of plasma-deposited parylene-C for electrochemical immunoassays
Source: Royal Society of Chemistry journal article supplement (doi:10.1039/d2an00854h), 2022-01-01
Supplement: d2an00854h1.pdf [file d2an00854h1.pdf]

## Supporting Information

### Carbon electrode obtained via pyrolysis of plasma-deposited parylene-C for electrochemical immunoassays

Zhiquan Song<sup>a</sup>, Jun-Hee Park<sup>a</sup>, Hong-Rae Kim<sup>a</sup>, Ga-Yeon Lee<sup>a,b</sup>,  
Min-Jung Kang<sup>c</sup>, Moo-Hwan Kim<sup>d</sup> and Jae-Chul Pyun<sup>a,\*</sup>

<sup>a</sup> Department of Materials Science and Engineering, Yonsei University, 50 Yonsei-Ro, Seodaemun-gu, Seoul, Korea. Tel: +82 2 2123 5851, Fax: +82 2 312 5375 Email: [jcpyun@yonsei.ac.kr](mailto:jcpyun@yonsei.ac.kr)

<sup>b</sup> Korea Institute of Ceramic Engineering and Technology (KICET), Jinju, Korea

<sup>c</sup> Korea Institute of Science and Technology (KIST), Seoul, Korea

<sup>d</sup> Femto Science Co., Hwasung, Korea

\* To whom correspondence should be addressed.

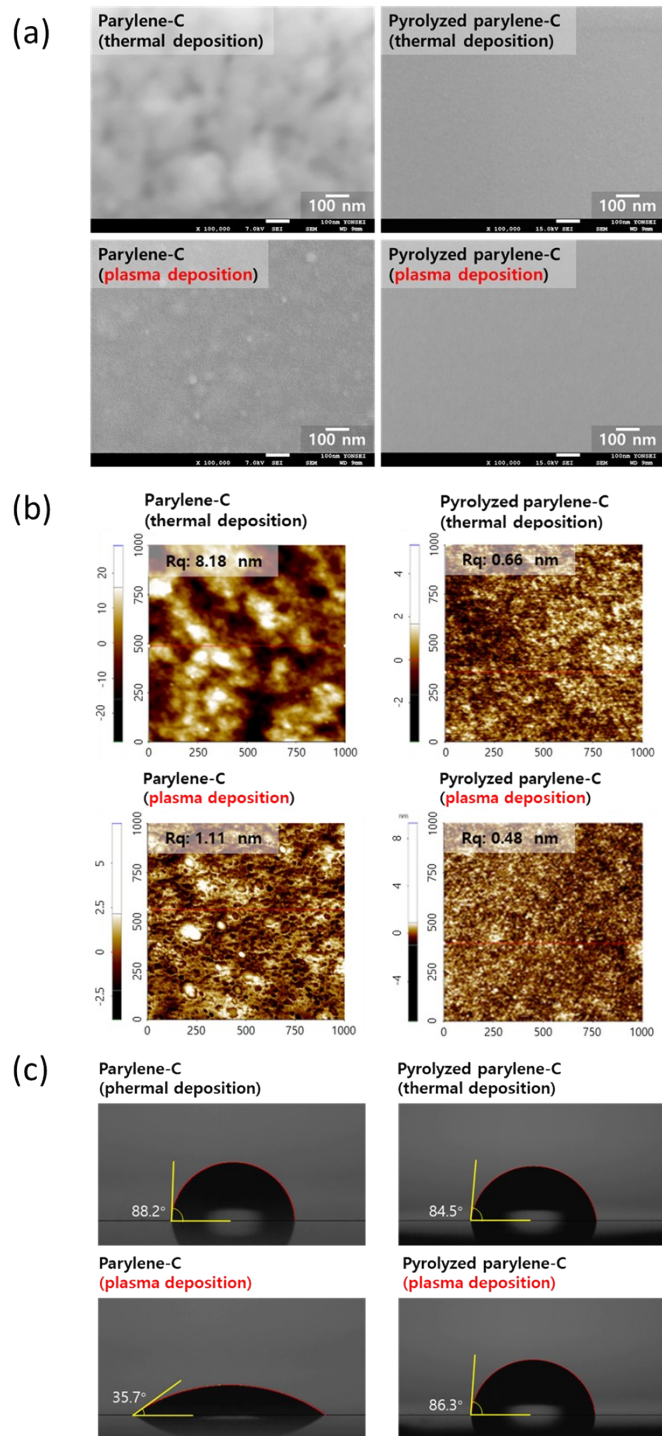

Fig. S1. Surface analysis of parylene-C obtained via thermal and plasma deposition. (a) Scanning electron microscopy images, (b) atomic force microscopy analyses, and (c) contact angle measurements

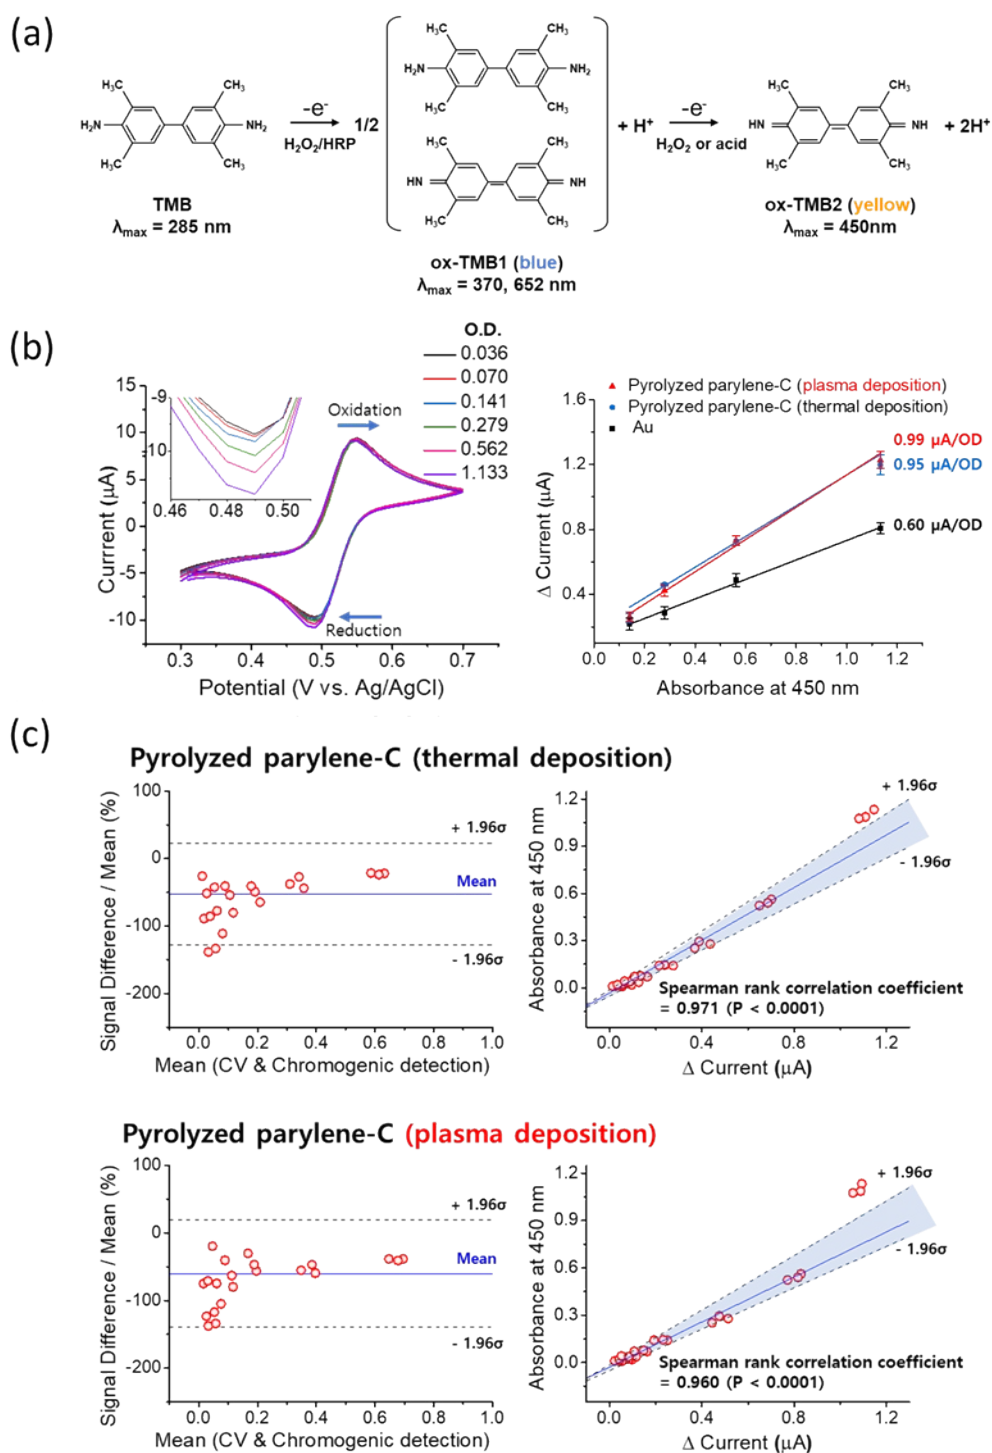

Fig. S2. TMB analysis using pyrolyzed parylene-C in electrochemical and conventional chromogenic measurements. (a) Redox reaction of TMB. (b) Cyclic voltammetry (CV) of TMB with absorbance at 450 nm (OD) values using pyrolyzed parylene-C obtained via thermal and plasma deposition. (c) Statistical comparison of TMB analysis using the Bland-Altman test and Passing-Bablok regression.

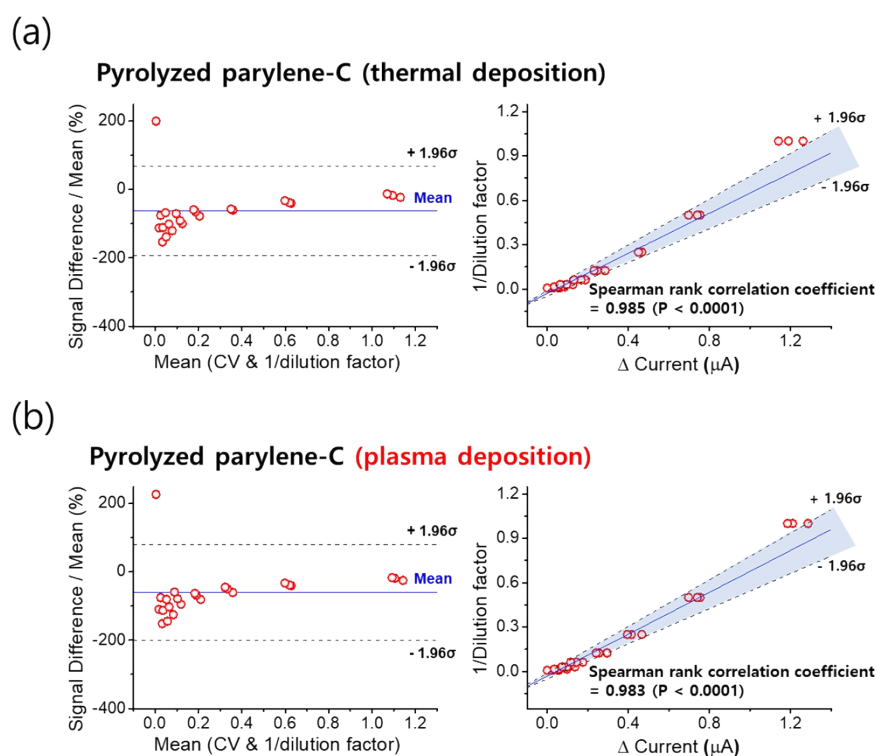

Fig. S3. Statistical comparison of ELISA for the diagnosis of human hepatitis-C and electrochemical analysis with pyrolyzed parylene-C obtained via (a) thermal and (b) plasma deposition using Bland-Altman test and Passing-Bablok regression.

Table S1. Peaks in the Fourier transform infrared spectra of parylene-C films obtained via thermal and plasma deposition before and after pyrolysis.

| Wave number (cm <sup>-1</sup> ) | Assignment                                              | Before pyrolysis |        | After pyrolysis |        | Type |
|---------------------------------|---------------------------------------------------------|------------------|--------|-----------------|--------|------|
|                                 |                                                         | Thermal          | Plasma | Thermal         | Plasma |      |
| 3018                            | Aromatic C–H stretching                                 | O                | O      | X               | X      | 3    |
| 2924                            | Aliphatic CH <sub>2</sub> , CH <sub>3</sub> stretching  | O                | O      | O               | O      | 1    |
| 2850                            | Aliphatic CH <sub>2</sub> , CH <sub>3</sub> stretching  | O                | O      | O               | O      | 1    |
| 1705                            | C=O stretching                                          | X                | O      | O               | O      | 2    |
| 1669                            | C=C stretching                                          | X                | X      | O               | O      | 4    |
| 1608                            | C=C stretching                                          | O                | O      | X               | X      | 3    |
| 1555                            | C=C stretching                                          | O                | O      | X               | X      | 3    |
| 1491                            | Bending of sp <sup>2</sup> C–H bonds in aromatic rings  | O                | O      | X               | X      | 3    |
| 1450                            | C–H bending                                             | O                | O      | X               | X      | 3    |
| 1397                            | C–H bending                                             | O                | O      | X               | X      | 3    |
| 1200                            | C–O stretching                                          | O                | O      | X               | X      | 3    |
| 1155                            | C–O stretching                                          | O                | O      | X               | X      | 3    |
| 1101                            | C–O stretching                                          | O                | O      | X               | X      | 3    |
| 1045                            | Vibrational stretches of C–Cl attached to aromatic ring | O                | O      | X               | X      | 3    |
| 875                             | C–H bending                                             | O                | O      | X               | X      | 3    |
| 823                             | C–H bending                                             | O                | O      | X               | X      | 3    |
| 687                             | C=C bending                                             | O                | O      | X               | X      | 3    |

- 1: Peaks observed for parylene-C films obtained via both deposition methods before and after pyrolysis.
- 2: Peaks observed only for the plasma-deposited parylene-C film (before pyrolysis).
- 3: Peaks observed for parylene-C films obtained via both deposition methods but not observed after pyrolysis.
- 4: Peaks only observed after pyrolysis

Table S2. Atomic compositions of the parylene-C films prepared via thermal and plasma deposition (at. % : atomic composition in percentage) according to X-ray photoelectron spectroscopy.

| Deposition method  | Pyrolysis | C (at. %) | N (at. %) | O (at. %) | Cl (at. %) | C 1S chemical state (at. %) |                   |                      |                     |                     |                      | sp <sup>2</sup> C/sp <sup>3</sup> C |
|--------------------|-----------|-----------|-----------|-----------|------------|-----------------------------|-------------------|----------------------|---------------------|---------------------|----------------------|-------------------------------------|
|                    |           |           |           |           |            | sp <sup>2</sup> C           | sp <sup>3</sup> C | sp <sup>3</sup> C-OH | sp <sup>2</sup> C=O | sp <sup>3</sup> C-N | sp <sup>2</sup> C-Cl |                                     |
| Thermal deposition | before    | 89.2      | 0         | 0.5       | 10.3       | 73.3                        | 20.8              | -                    | -                   | -                   | 5.9                  | 3.5                                 |
|                    | after     | 96.5      | 0         | 3.5       | 0          | 70.8                        | 18.2              | 7.0                  | 4.0                 | -                   | -                    | 3.9                                 |
| Plasma deposition  | before    | 71.0      | 10.7      | 14.6      | 3.7        | 33.9                        | 17.1              | 14.3                 | 18.4                | 12.7                | 3.6                  | 2.0                                 |
|                    | after     | 97.0      | 1.4       | 1.6       | 0          | 72.5                        | 18.6              | 6.0                  | 2.9                 | -                   | -                    | 3.9                                 |

Table S3. Raman peaks of the thermally or plasma-deposited parylene-C films before and after pyrolysis.

| Wave number (cm <sup>-1</sup> ) | Assignment                                                                      | Before pyrolysis |        | After pyrolysis |        | Type |
|---------------------------------|---------------------------------------------------------------------------------|------------------|--------|-----------------|--------|------|
|                                 |                                                                                 | Thermal          | Plasma | Thermal         | Plasma |      |
| 630.8                           | C-Cl stretching                                                                 | O                | O      | X               | X      | 3    |
| 691.8                           |                                                                                 | O                | O      | X               | X      | 3    |
| 952.3                           | C-O-C stretching                                                                | O                | O      | X               | X      | 3    |
| 1008                            | symmetric ring breathing                                                        | O                | O      | X               | X      | 3    |
| 1211                            | C-H in-plane deformations                                                       | O                | X      | X               | X      | 2    |
| 1340                            | CH <sub>2</sub> wagging<br>And twisting vibrations                              | O                | X      | X               | X      | 2    |
| 1443.2                          | CH scissoring in CH <sub>2</sub> , C=C in-plane vibrations of the aromatic ring | O                | X      | X               | X      | 2    |
| 1610.7                          |                                                                                 | O                | O      | X               | X      | 3    |
| 2710.3                          | C-H stretching vibrations of the aromatic ring                                  | X                | O      | X               | X      | 1    |
| 2859.2                          |                                                                                 | O                | X      | X               | X      | 2    |
| 2930.9                          |                                                                                 | O                | X      | X               | X      | 2    |
| 3050.5                          |                                                                                 | O                | X      | X               | X      | 2    |
| 1361.1~1366.4                   | D peak                                                                          | X                | X      | O               | O      | 4    |
| 1595.9~1597.1                   | G peak                                                                          | X                | X      | O               | O      | 4    |

1: Peaks observed only for the plasma-deposited parylene-C film (before pyrolysis).

2: Peaks observed only for the thermally deposited parylene-C film (before pyrolysis).

3: Peaks observed in the parylene-C films obtained via both deposition methods (before pyrolysis).

4: Peaks observed only after pyrolysis.

Table S4. Electrochemical parameters of pyrolyzed parylene-C obtained via thermal and plasma deposition.

|                                      | $C_{dl}$<br>( $\mu\text{F}/\text{cm}^2$ ) | $k_{app}$<br>( $\text{cm}/\text{s}$ ) | Electrochemical<br>Window<br>vs. (Ag/AgCl) |
|--------------------------------------|-------------------------------------------|---------------------------------------|--------------------------------------------|
| Pyrolyzed<br>parylene-C<br>(thermal) | 2.20                                      | $1.2 \times 10^{-3}$                  | -1.0~2.1 V                                 |
| Pyrolyzed<br>parylene-C<br>(plasma)  | 2.10                                      | $1.1 \times 10^{-3}$                  | -1.0~2.1 V                                 |
